# Supplementary material for: Introduction of anti-fouling coatings at the surface of supramolecular elastomeric materials via post-modification of reactive supramolecular additives
Source: Royal Society of Chemistry journal article supplement (doi:10.1039/c7py00801e), 2017-01-01
Supplement: c7py00801e1.pdf [file c7py00801e1.pdf]

## Electronic Supplementary Information (ESI)

### **Introduction of anti-fouling coatings at the surface of supramolecular elastomeric materials via post-modification of reactive supramolecular additives**

Olga J.G.M. Goor<sup>1,2</sup>, Joyce, E.P. Brouns<sup>1,2</sup> and Patricia Y.W. Dankers<sup>1,2,\*</sup>

<sup>1</sup>Institute for Complex Molecular Systems, Eindhoven University of Technology, P.O. Box 513, 5600 MB Eindhoven, The Netherlands. Tel: +31 40 247 5451

<sup>2</sup>Laboratory of Chemical Biology, Department of Biomedical Engineering, P.O. Box 513, 5600 MB Eindhoven, The Netherlands

\*E-Mail: [p.y.w.dankers@tue.nl](mailto:p.y.w.dankers@tue.nl)

## Surface characterization

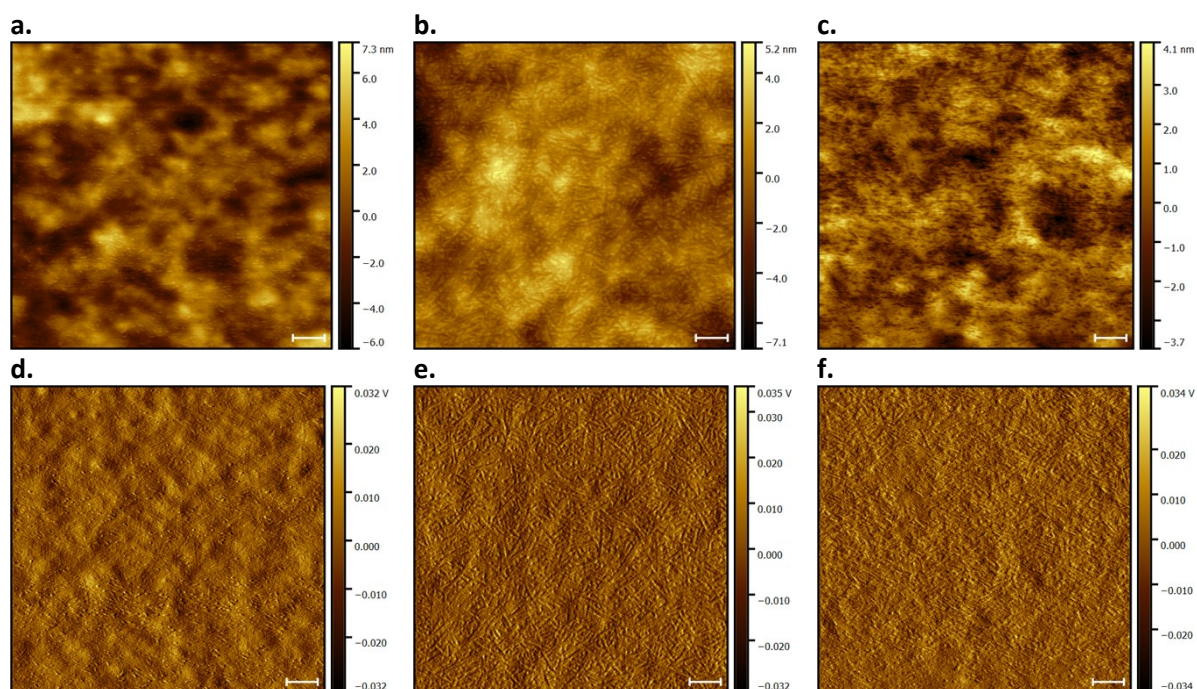

**Figure S1.** AFM height and amplitude micrographs of the different surfaces, PCLdiUPy height (a) and amplitude (d), PCLdiUPy with 10 mol% height (b) and amplitude (e) and PCLdiUPy with 10 mol% UPy-Tz and reacted with star-PEG-BCN height (c) and amplitude (f). Scale bars represent 100 nm.

## Characterization of surface reaction

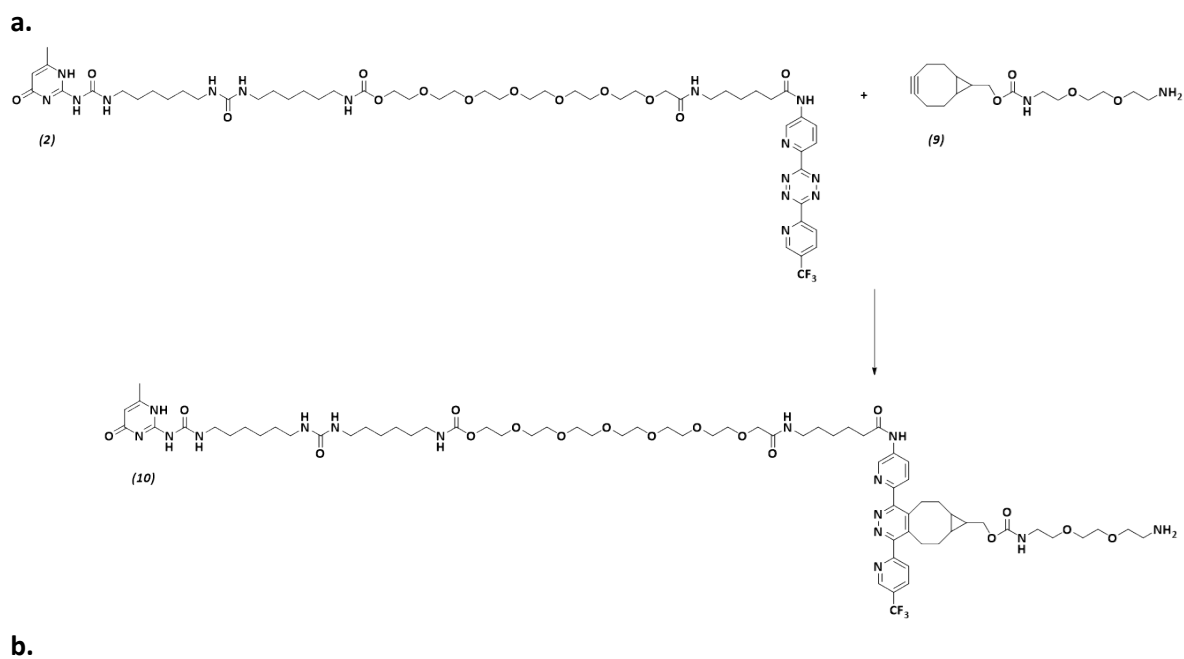

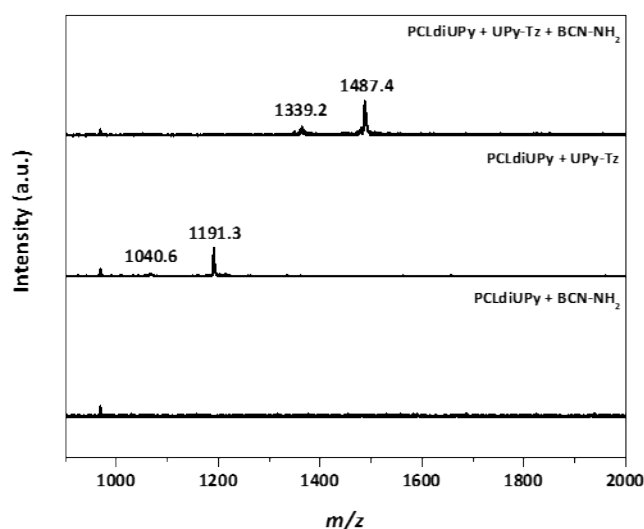

**Figure S2.** Surface reaction of the UPy-Tz (**2**) with a model compound BCN-NH<sub>2</sub> (**9**), a) Reaction scheme of the UPy-Tz (**2**) with the BCN-NH<sub>2</sub> (**9**) to form the reaction product UPy-TZ-BCN (**10**), MW = 1185.8 g·mol<sup>-1</sup> and b) Surface MALDI-ToF MS spectrum of the different surfaces, PCLdiUPy incubated with BCN-NH<sub>2</sub> (**9**), PCLdiUPy with UPy-Tz and PCLdiUPy with UPy-Tz incubated with BCN-NH<sub>2</sub> (**9**), yielding the reaction product (**10**). Masses of interest: UPy-Tz (**2**):  $m/z$  1190.3 (observed:  $m/z$  1191.3) and UPy-Tz where the UPy-moiety is cleaved off ( $\Delta m/z$  151)  $m/z$  1138.2 (observed:  $m/z$  1040.6) and UPy-Tz-BCN product (**10**):  $m/z$  1485.8 (observed:  $m/z$  1487.4) and the reaction product (**10**) with the UPy-moiety cleaved  $m/z$  1334.6 (observed:  $m/z$  1339.2).

#### Method:

**Surface MALDI-ToF MS.** Matrix-assisted laser desorption ionization time-of-flight mass spectrometry (MALDI-ToF MS) was performed on an Autoflex Speed MALDI-MS (Bruker) using an  $\alpha$ -cyano-4-hydroxycinnamic acid (CHCA) matrix. Surface MALDI-ToF MS experiments were performed on drop-cast samples on a MTP 384 target plate polished steel TF. Dropcast were prepared by 3  $\mu$ L 50 mg·mL<sup>-1</sup> PCLdiUPy + 10 mol% UPy-Tz and directly deposited on the MALDI plate. Next, drop-cast spots were incubated with 10  $\mu$ L 100  $\mu$ M BCN-NH<sub>2</sub> (**9**) solution for 70 minutes, after which the reaction solution was discarded from the MALDI plate and the spots were washed 3 times with 10  $\mu$ L milli-Q water. Subsequently 1  $\mu$ L CHCA in 49.5/49.5/1 MeCN/water/TFA (v/v/v%) was spotted on each surface and allowed to dry for 30 minutes. MALDI-ToF Ms measurements were performed in positive linear mode (method: 700-2000 Da), 2500 shots per spot and a laser power of 60%.

## Protein adsorption measurements

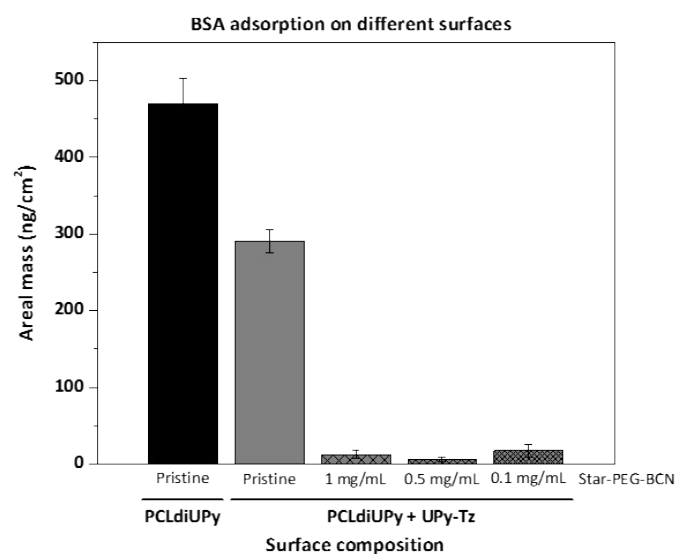

**Figure S3.** Overview of the modelled mass adsorption of BSA ( $30 \text{ mg} \cdot \text{mL}^{-1}$ ) as determined by QCM-D using a Voigt-Voinova viscoelastic model on the different surfaces, pristine PCLdiUPy and PCLdiUPy with 10 mol% UPy-Tz. Different star-PEG-BCN concentrations ( $1 \text{ mg} \cdot \text{mL}^{-1}$ ,  $0.5 \text{ mg} \cdot \text{mL}^{-1}$  and  $0.1 \text{ mg} \cdot \text{mL}^{-1}$  were immobilized on the PCLdiUPy with 10 mol% UPy-Tz surfaces to tune surface properties. Adsorption is represented as mean  $\pm$  SD ( $n \geq 4$ ).

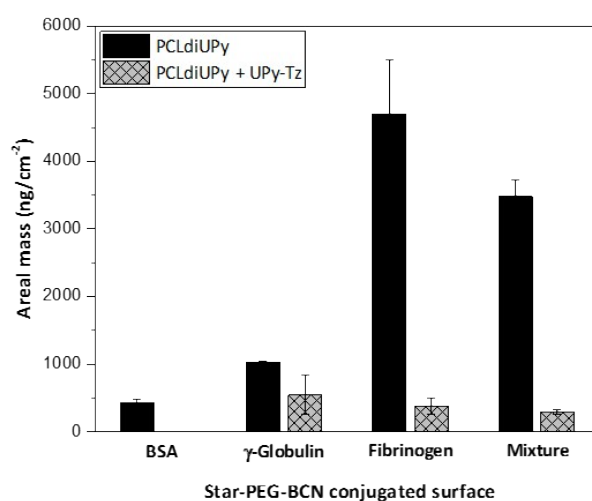

**Figure S4.** Overview of the modelled mass adsorption as determined by QCM-D using a Voigt-Voinova viscoelastic model. BSA ( $30 \text{ mg} \cdot \text{mL}^{-1}$ ),  $\gamma$ -globulin ( $10 \text{ mg} \cdot \text{mL}^{-1}$ ), fibrinogen ( $3 \text{ mg} \cdot \text{mL}^{-1}$ ) and the corresponding protein mixture (Vroman series) on both PCLdiUPy and PCLdiUPy with 10 mol% UPy-Tz spin coated supramolecular surfaces conjugated with star-PEG BCN. Adsorption is represented as mean  $\pm$  SD ( $n \geq 2$ ).

## Cell attachment studies

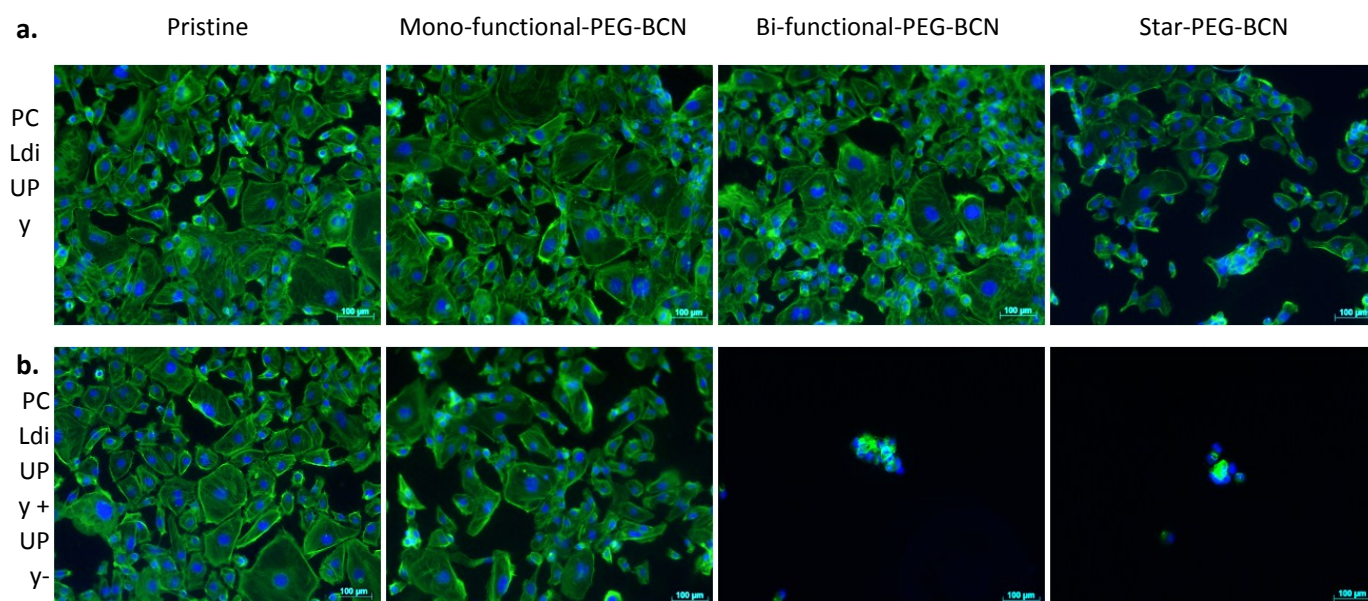

**Figure S5.** Fluorescence microscopy graphs of HK-2 cells on spincoated surfaces after 24 hours of culture. Upper row represents images of PCLdiUPy (a) the pristine material or incubated with either mono-functional-PEG-BCN, bi-functional-PEG-BCN or star-PEG-BCN (from left to right). Lower row represents Images of PCLdiUPy with 10 mol% UPy-Tz incorporated (b) the pristine material or incubated with either mono-functional-PEG-BCN, bi-functional-PEG-BCN or star-PEG-BCN (from left to right). The actin skeleton is stained with Phalloidin (green), the nuclei are stained with DAPI (blue). Scale bars represent 100  $\mu\text{m}$ .

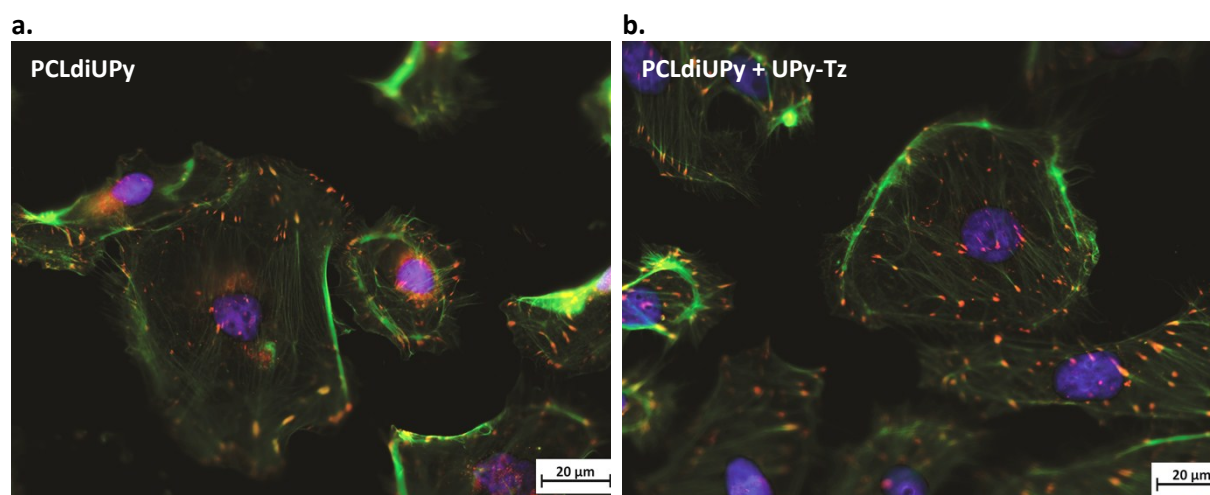

**Figure S6.** Fluorescence microscopy graphs of HK-2 cells on spincoated surfaces after 72 hours of culture on a) PCLdiUPy and b) PCLdiUPy with 10 mol% UPy-Tz. The actin skeleton is stained with Phalloidin (green), the nuclei are stained with DAPI (blue) and the focal adhesions were stained with Atto-555 (red). Scale bars represent 20  $\mu\text{m}$ .

## Synthesis and characterization

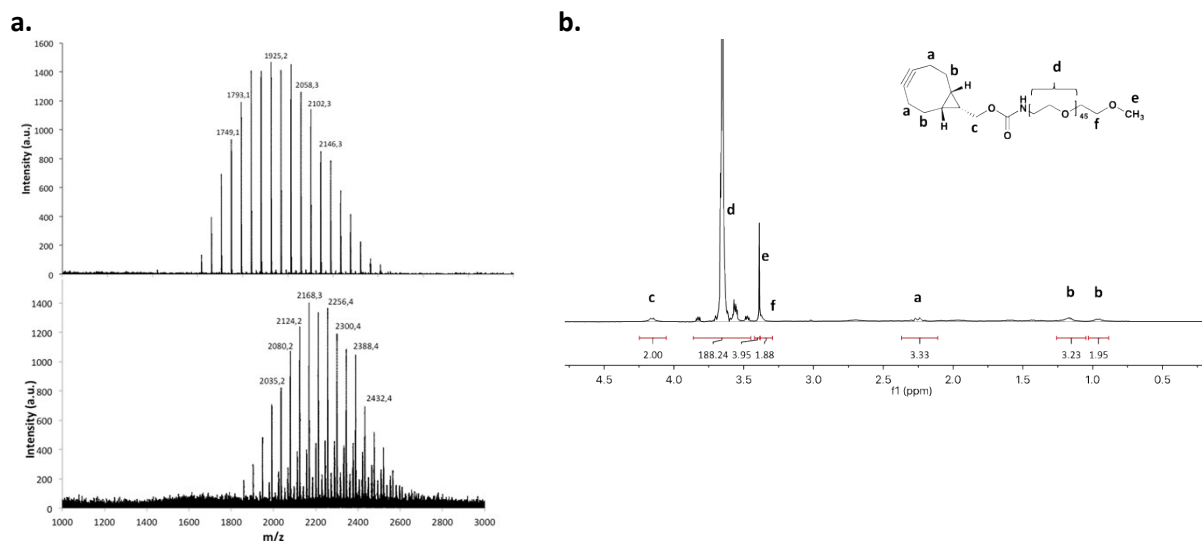

**Figure S7.** Characterization of the monofunctional-PEG-BCN (**3**) synthesis, a) MALDI-ToF MS spectra of the methoxy-PEG-amine prior to (upper spectrum) and after (lower spectrum) BCN-functionalization and b)  $^1\text{H}$  NMR spectrum of the monofunctional-PEG-BCN (**3**).

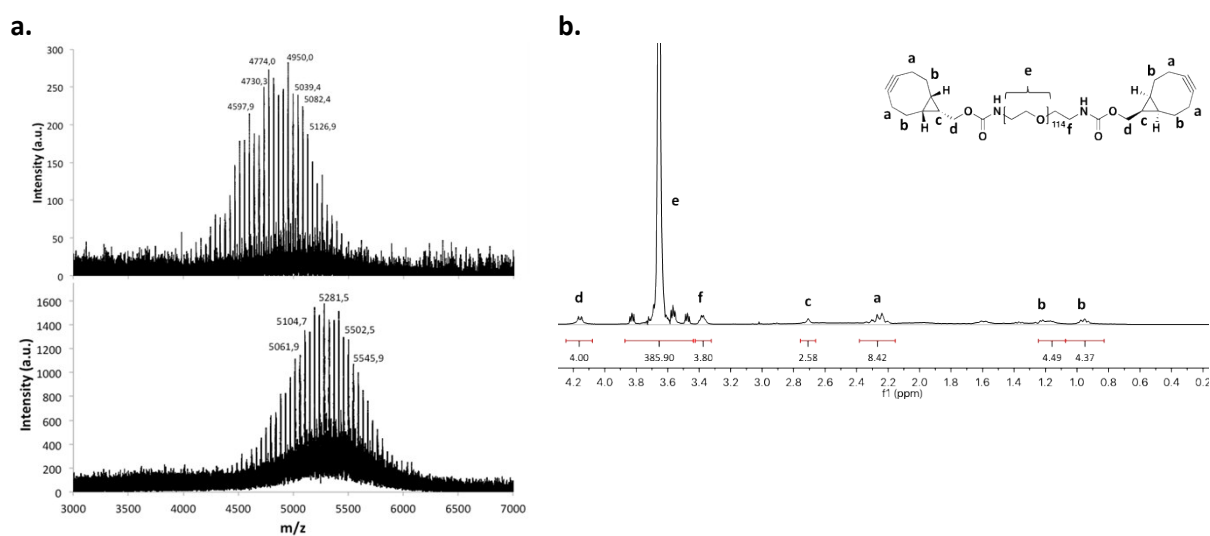

**Figure S8.** Characterization of the bifunctional-PEG-BCN (**4**) synthesis, a) MALDI-ToF MS spectra of the PEG-diamine prior to (upper spectrum) and after (lower spectrum) BCN-functionalization and b)  $^1\text{H}$  NMR spectrum of the bifunctional-PEG-BCN (**4**).

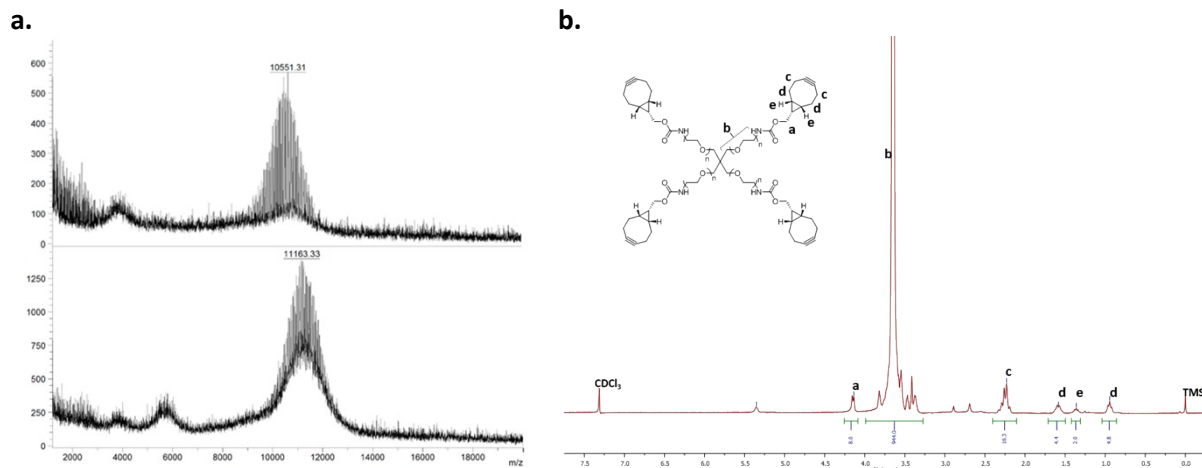

**Figure S9.** Characterization of the star-PEG-BCN (**5**) synthesis, a) MALDI-ToF MS spectra of the star-PEG-tetraamine prior to (upper spectrum) and after (lower spectrum) BCN-functionalization and b) <sup>1</sup>H NMR spectrum of the star-PEG-BCN (**5**).
